# Supplementary material for: Metal-templated synthesis of rigid and conformationally restricted cyclic bisporphyrins: specific retention times on a cyanopropyl-modified silica gel column
Source: Royal Society of Chemistry journal article supplement (doi:10.1039/d1ob00088h), 2021-01-01
Supplement: d1ob00088h1.pdf [file d1ob00088h1.pdf]

## Materials only for reviewers

### Metal-Templated Synthesis of Rigid and Conformationally Restricted Cyclic Bisporphyrins: Specific Retention Times on Cyanopropyl-Modified Silica Gel Column

Masaya Hashimoto, Yusuke Kuramochi, Sayumi Ito, Yuho Kinbara, and Akiharu Satake

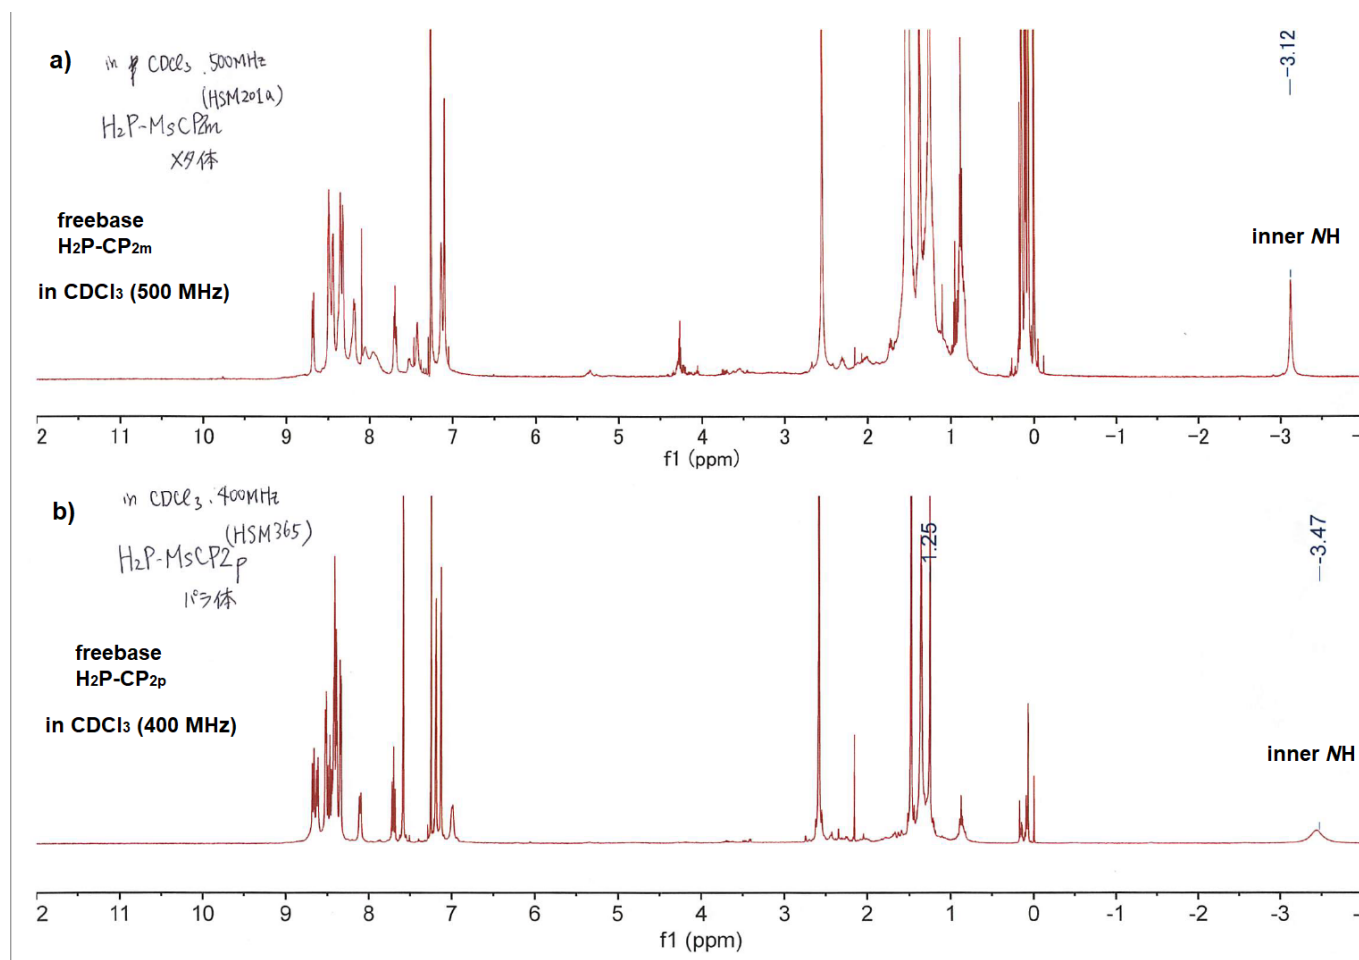

Figure A.  $^1\text{H}$  NMR spectra of a)  $\text{H}_2\text{P-CP2m}$  and b)  $\text{H}_2\text{P-CP2p}$  in  $\text{CDCl}_3$ .

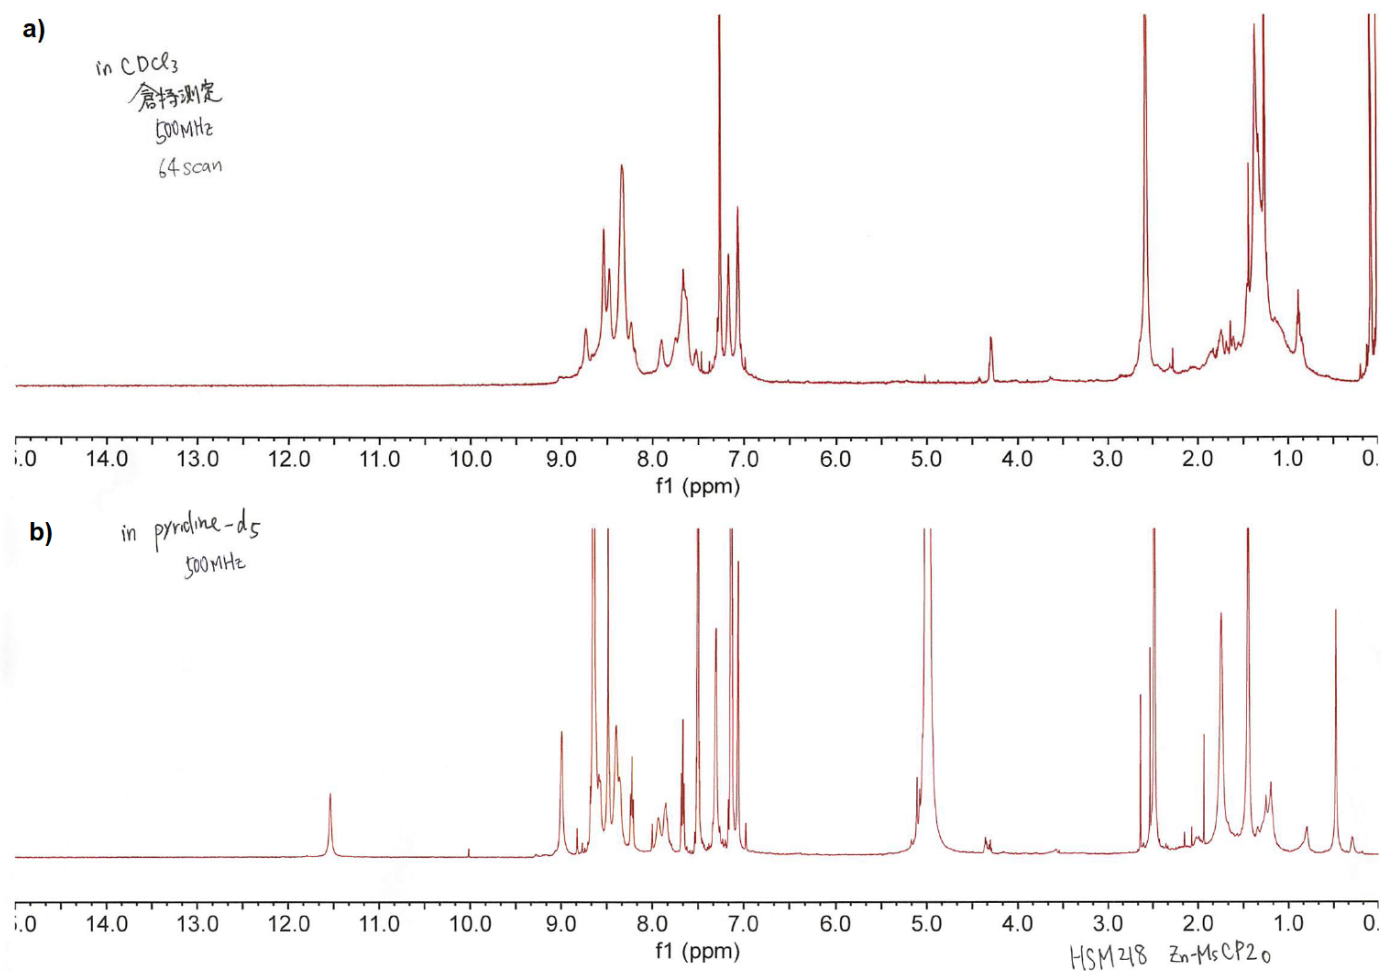

Figure B. <sup>1</sup>H NMR spectra (500 MHz) of **H<sub>2</sub>P-CP2<sub>0</sub>** in a) CDCl<sub>3</sub> and b) pyridine-d<sub>5</sub>.
